# Supplementary material for: Muscle metabolomics analysis reveals potential biomarkers of exercise-dependent improvement of the diaphragm function in chronic obstructive pulmonary disease
Source: PubMed Central journal article supplement — Int J Mol Med. 2020 Mar 12;45(6):1644–60. doi: 10.3892/ijmm.2020.4537 (PMC7169662; doi:10.3892/ijmm.2020.4537), 2020-03-12

Figure S1. Reticulin staining results from different rats in each group. (A-C) Reticulin staining results of CG. (D-F) Reticulin staining results of CMG. (G-I) Reticulin staining results of CEG. The red arrows indicate broken reticulin fibers. Scale bars, 20  $\mu\text{m}$ . COPD, chronic obstructive pulmonary disease; CG, control group; CMG, COPD model group; CEG, COPD + exercise group.

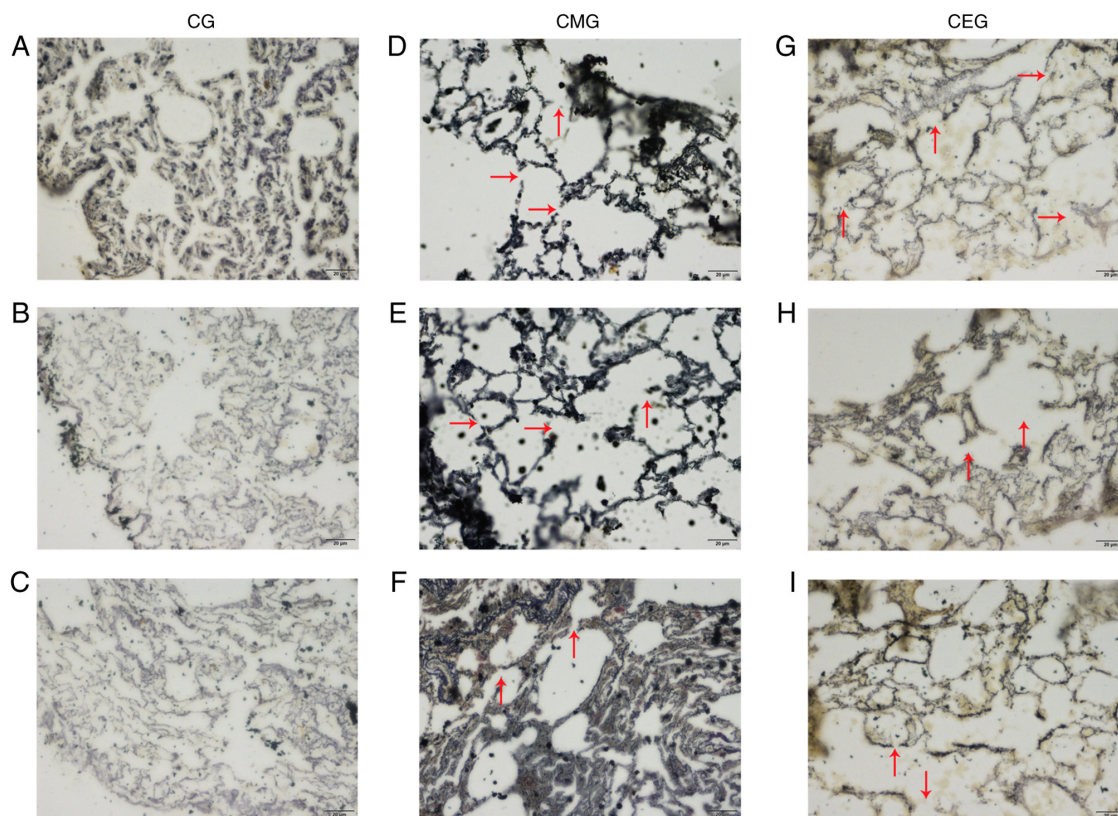

Supplement: Supplementary_Data.pdf [file Supplementary_Data.pdf]
